# Supplementary material for: Predicting Carotid Atherosclerosis in Latent Autoimmune Diabetes in Adult Patients Using Machine Learning Models: A Retrospective Study
Source: Research Square preprint supplement (doi:10.21203/rs.3.rs-6131962/v1), 2025-04-14
Supplement: Supplementary file 1 [file 71c6c08f20a1681321131e40.docx]

Supplementary Material

# Supplementary Tables

## Table S1 Univariate and multivariate logistic regression results.

| Variables | univariate logistic regression | | | | |  | multivariate logistic regression | | | | |
| --- | --- | --- | --- | --- | --- | --- | --- | --- | --- | --- | --- |
| β | S.E | Z | *P* | OR (95%CI) | β | S.E | Z | *P* | OR (95%CI) |
| Age | 0.16 | 0.03 | 6.34 | <.001 | 1.18 (1.12 ~ 1.24) |  | 0.22 | 0.04 | 5.88 | <.001 | 1.24 (1.16 ~ 1.34) |
| Gender |  |  |  |  |  |  |  |  |  |  |  |
| Men |  |  |  |  | 1.00 (Reference) |  |  |  |  |  |  |
| Women | -0.23 | 0.34 | -0.66 | 0.507 | 0.80 (0.41 ~ 1.56) |  |  |  |  |  |  |
| Diabetes duration | 0.06 | 0.02 | 2.40 | 0.016 | 1.06 (1.01 ~ 1.11) |  |  |  |  |  |  |
| Smoke |  |  |  |  |  |  |  |  |  |  |  |
| No |  |  |  |  | 1.00 (Reference) |  |  |  |  |  | 1.00 (Reference) |
| Yes | 0.80 | 0.35 | 2.27 | 0.023 | 2.22 (1.12 ~ 4.42) |  | 2.60 | 0.71 | 3.63 | <.001 | 13.42 (3.31 ~ 54.47) |
| Drink |  |  |  |  |  |  |  |  |  |  |  |
| No |  |  |  |  | 1.00 (Reference) |  |  |  |  |  |  |
| Yes | 0.11 | 0.37 | 0.30 | 0.763 | 1.12 (0.54 ~ 2.32) |  |  |  |  |  |  |
| Insulin usage |  |  |  |  |  |  |  |  |  |  |  |
| No |  |  |  |  | 1.00 (Reference) |  |  |  |  |  |  |
| Yes | -0.60 | 0.38 | -1.59 | 0.112 | 0.55 (0.26 ~ 1.15) |  |  |  |  |  |  |
| BMI | 0.15 | 0.05 | 2.69 | 0.007 | 1.16 (1.04 ~ 1.29) |  |  |  |  |  |  |
| SBP | 0.03 | 0.01 | 3.52 | <.001 | 1.03 (1.01 ~ 1.05) |  |  |  |  |  |  |
| DBP | 0.01 | 0.01 | 0.76 | 0.449 | 1.01 (0.98 ~ 1.04) |  |  |  |  |  |  |
| HbA1c | -0.01 | 0.08 | -0.07 | 0.942 | 0.99 (0.85 ~ 1.16) |  |  |  |  |  |  |
| FPG | -0.05 | 0.06 | -0.75 | 0.453 | 0.96 (0.85 ~ 1.08) |  |  |  |  |  |  |
| FCP | 0.17 | 0.16 | 1.08 | 0.282 | 1.19 (0.87 ~ 1.63) |  |  |  |  |  |  |
| FI | -0.00 | 0.02 | -0.00 | 0.999 | 1.00 (0.95 ~ 1.05) |  |  |  |  |  |  |
| TC | 0.00 | 0.10 | 0.05 | 0.963 | 1.00 (0.82 ~ 1.23) |  |  |  |  |  |  |
| TG | 0.02 | 0.11 | 0.21 | 0.831 | 1.02 (0.82 ~ 1.27) |  |  |  |  |  |  |
| HDL | -0.63 | 0.55 | -1.14 | 0.254 | 0.53 (0.18 ~ 1.57) |  |  |  |  |  |  |
| LDL | 0.18 | 0.18 | 1.00 | 0.316 | 1.20 (0.84 ~ 1.71) |  |  |  |  |  |  |
| TyG | -0.15 | 0.39 | -0.38 | 0.704 | 0.86 (0.40 ~ 1.85) |  |  |  |  |  |  |
| AIP | 0.69 | 0.53 | 1.29 | 0.197 | 1.99 (0.70 ~ 5.67) |  |  |  |  |  |  |
| IAB | 0.00 | 0.01 | 0.79 | 0.427 | 1.00 (0.99 ~ 1.01) |  |  |  |  |  |  |
| ICA | 0.00 | 0.00 | 1.25 | 0.212 | 1.00 (1.00 ~ 1.01) |  |  |  |  |  |  |
| GADA | 0.00 | 0.00 | 0.68 | 0.497 | 1.00 (1.00 ~ 1.00) |  |  |  |  |  |  |
| ALT | 0.00 | 0.01 | 0.46 | 0.644 | 1.00 (0.99 ~ 1.02) |  |  |  |  |  |  |
| AST | 0.01 | 0.01 | 0.51 | 0.609 | 1.01 (0.98 ~ 1.03) |  |  |  |  |  |  |
| BUN | 0.05 | 0.07 | 0.72 | 0.474 | 1.05 (0.92 ~ 1.21) |  |  |  |  |  |  |
| Scr | 0.00 | 0.01 | 0.16 | 0.874 | 1.00 (0.99 ~ 1.01) |  |  |  |  |  |  |
| UA | 0.00 | 0.00 | 0.14 | 0.892 | 1.00 (1.00 ~ 1.00) |  |  |  |  |  |  |
| ALB | -0.11 | 0.04 | -2.58 | 0.010 | 0.90 (0.83 ~ 0.97) |  |  |  |  |  |  |
| WBC | -0.04 | 0.08 | -0.46 | 0.643 | 0.96 (0.82 ~ 1.13) |  |  |  |  |  |  |
| TSH | -0.00 | 0.08 | -0.06 | 0.956 | 1.00 (0.85 ~ 1.17) |  |  |  |  |  |  |
| FT3 | -1.15 | 0.44 | -2.61 | 0.009 | 0.32 (0.13 ~ 0.75) |  |  |  |  |  |  |
| FT4 | 0.24 | 0.57 | 0.42 | 0.671 | 1.27 (0.42 ~ 3.89) |  |  |  |  |  |  |
| 25(OH)D | 0.02 | 0.02 | 0.94 | 0.347 | 1.02 (0.98 ~ 1.06) |  |  |  |  |  |  |

## Table S2 Baseline characteristics in the training and testing cohorts.

| **Variables** | **Total (n = 142)** | **Training set (n = 100)** | **Testing set (n = 42)** | **P** |
| --- | --- | --- | --- | --- |
| **Age (years)** | 44.00 (33.25, 57.00) | 46.50 (34.00, 61.50) | 43.50 (33.00, 55.00) | 0.37 |
| **Gender (n, %)** |  |  |  | 0.09 |
| Male | 79 (55.63) | 28 (66.67) | 51 (51.00) |  |
| Female | 63 (44.37) | 14 (33.33) | 49 (49.00) |  |
| **Diabetes duration (years)** | 7.00 (2.00, 14.00) | 5.00 (2.00, 14.50) | 8.50 (2.00, 14.00) | 0.62 |
| **Smoke (n, %)** |  |  |  | 0.51 |
| No | 87 (61.27) | 24 (57.14) | 63 (63.00) |  |
| Yes | 55 (38.73) | 18 (42.86) | 37 (37.00) |  |
| **Drink (n, %)** |  |  |  | 0.24 |
| No | 101 (71.13) | 27 (64.29) | 74 (74.00) |  |
| Yes | 41 (28.87) | 15 (35.71) | 26 (26.00) |  |
| **Insulin usage (n, %)** |  |  |  | 0.73 |
| No | 40 (28.17) | 11 (26.19) | 29 (29.00) |  |
| Yes | 102 (71.83) | 31 (73.81) | 71 (71.00) |  |
| **Carotid atherosclerosis (n, %)** |  |  |  | 0.61 |
| No | 79 (55.63) | 22 (52.38) | 57 (57.00) |  |
| Yes | 63 (44.37) | 20 (47.62) | 43 (43.00) |  |
| **BMI (kg/m2)** | 22.11 (20.13, 24.30) | 22.46 (19.95, 24.39) | 22.04 (20.26, 23.88) | 0.87 |
| **SBP (mmHg)** | 128.81 ± 21.21 | 129.19 ± 19.90 | 128.65 ± 21.83 | 0.89 |
| **DBP (mmHg)** | 76.00 (70.00, 84.00) | 74.50 (70.00, 86.25) | 76.00 (70.00, 84.00) | 0.95 |
| **HbA1c (%)** | 9.60 (8.40, 10.61) | 9.69 (8.72, 10.91) | 9.48 (7.97, 10.59) | 0.28 |
| **FPG (mmol/L)** | 8.36 (6.58, 10.25) | 8.14 (6.79, 9.83) | 8.45 (6.57, 10.59) | 0.66 |
| **FCP (uIU/mL)** | 0.33 (0.12, 1.35) | 0.39 (0.15, 1.27) | 0.31 (0.08, 1.37) | 0.87 |
| **FI (uIU/mL)** | 5.52 (2.94, 7.72) | 4.16 (1.69, 7.34) | 5.86 (3.44, 7.85) | 0.18 |
| **TC (mmol/L)** | 4.73 (3.84, 5.60) | 4.72 (3.69, 5.76) | 4.73 (4.04, 5.55) | 0.73 |
| **TG (mmol/L)** | 1.33 (0.88, 2.02) | 1.29 (0.89, 1.88) | 1.33 (0.88, 2.06) | 0.89 |
| **HDL-C (mmol/L)** | 1.25 (1.07, 1.49) | 1.31 (1.15, 1.51) | 1.23 (1.06, 1.48) | 0.56 |
| **LDL-C (mmol/L)** | 2.97 ± 0.95 | 2.91 ± 1.01 | 2.99 ± 0.93 | 0.66 |
| **TyG** | 9.48 ± 0.43 | 9.45 ± 0.44 | 9.49 ± 0.43 | 0.60 |
| **AIP** | 0.02 (-0.13, 0.21) | 0.02 (-0.13, 0.19) | 0.02 (-0.14, 0.24) | 0.88 |
| **IAB (IU/mL)** | 8.41 (5.71, 16.66) | 6.81 (5.45, 15.15) | 9.00 (5.80, 16.75) | 0.30 |
| **ICA (IU/mL)** | 24.20 (9.52, 57.12) | 31.26 (11.03, 55.37) | 23.22 (9.50, 57.13) | 0.52 |
| **GADA (IU/mL)** | 53.80 (24.31, 135.81) | 60.54 (25.69, 154.05) | 51.32 (23.97, 118.40) | 0.52 |
| **ALT (IU/L)** | 19.01 (13.75, 27.21) | 19.75 (13.80, 22.98) | 18.75 (13.80, 28.05) | 0.66 |
| **AST (IU/L)** | 19.25 (16.12, 23.60) | 19.50 (15.53, 23.75) | 18.80 (16.17, 23.38) | 0.95 |
| **BUN (mmol/L)** | 5.97 (4.93, 7.10) | 5.60 (4.95, 6.38) | 6.15 (4.97, 7.30) | 0.20 |
| **Scr (μmol/L)** | 76.00 (67.23, 86.25) | 74.40 (67.73, 80.61) | 77.40 (66.62, 87.78) | 0.36 |
| **UA (μmol/L)** | 277.70 (228.15, 331.52) | 268.35 (212.28, 315.35) | 287.35 (230.93, 333.30) | 0.25 |
| **ALB (g/L)** | 42.20 (39.32, 44.90) | 42.00 (39.50, 44.80) | 42.35 (39.30, 44.90) | 0.98 |
| **WBC (*109/L)** | 6.10 (5.20, 7.29) | 5.76 (5.10, 6.97) | 6.16 (5.30, 7.43) | 0.28 |
| **TSH (mIU/L)** | 1.81 (1.13, 3.00) | 1.85 (1.26, 2.61) | 1.76 (1.12, 3.05) | 0.84 |
| **FT3 (pmol/L)** | 2.96 (2.77, 3.26) | 2.89 (2.66, 3.25) | 2.98 (2.82, 3.25) | 0.18 |
| **FT4 (ng/dL)** | 1.35 ± 0.30 | 1.30 ± 0.29 | 1.36 ± 0.30 | 0.28 |
| **25(OH)D (ng/mL)** | 17.52 (12.78, 20.56) | 18.01 (13.84, 22.49) | 16.91 (12.50, 20.34) | 0.37 |

# Supplementary Figure


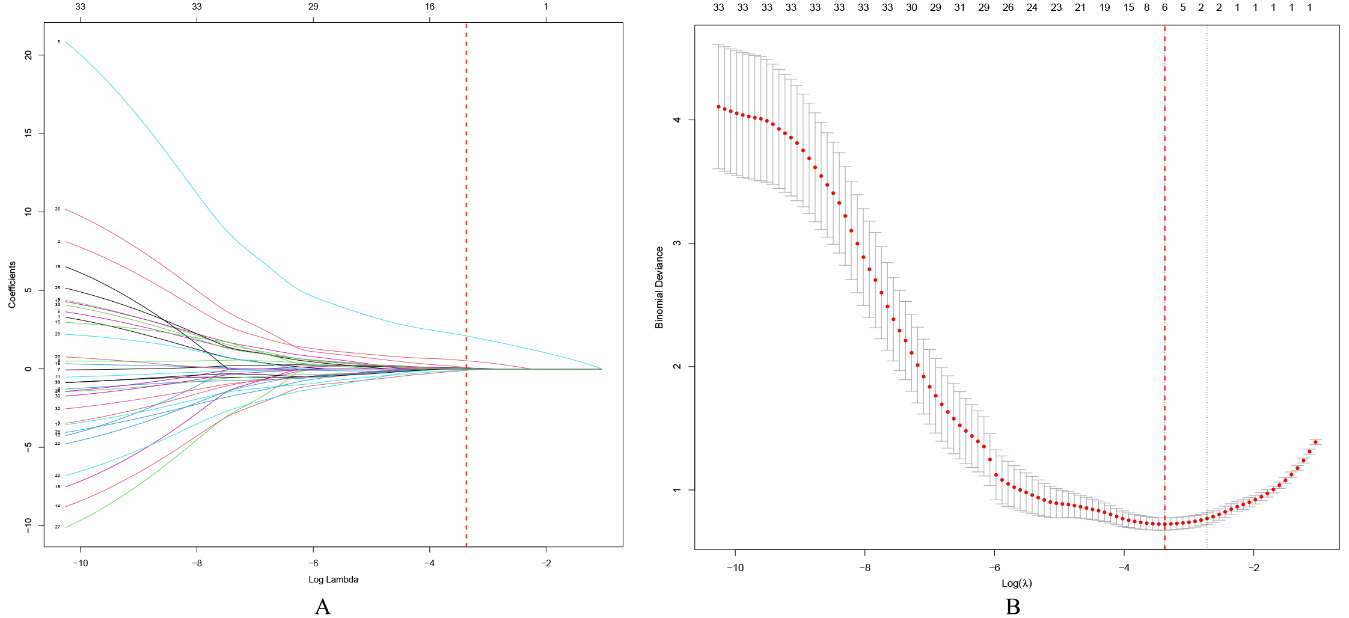


## Figure S1 Variable selection by the LASSO regression model.

(A) Choice of the optimal parameter (λ) in the LASSO regression model with logλ as the horizontal coordinate and regression coefficients as the vertical coordinate. (B) plot of λ vs. number of variables with logλ as the bottom horizontal coordinate, binomial deviance as the vertical coordinate, and number of variables as the top horizontal coordinate.


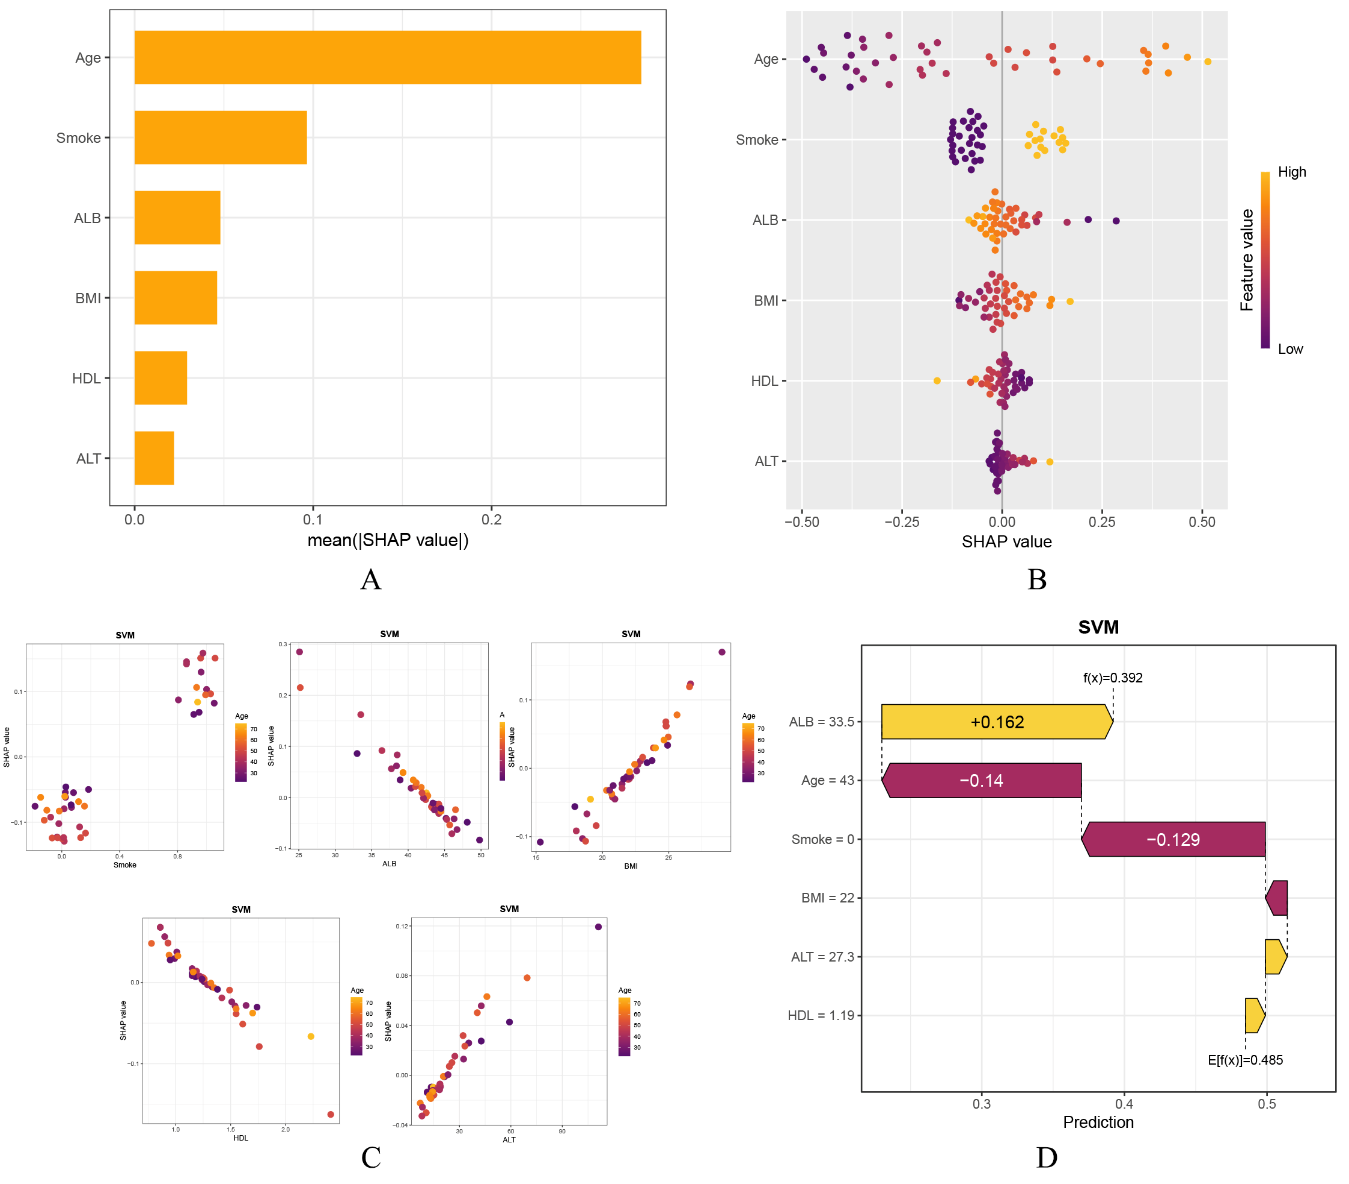


## Figure S2 SHAP interprets the SVM model.

(A) Ranking of variable importance based on the average SHAP value. (B) All samples and features are illustrated, with each row representing a feature and x-axis representing the SHAP value. The yellow dots represent higher feature values, while the purple dots represent lower feature values. (C) The SHAP dependence plot of the SVM model. (D) The SHAP waterfall plot of the SVM model.


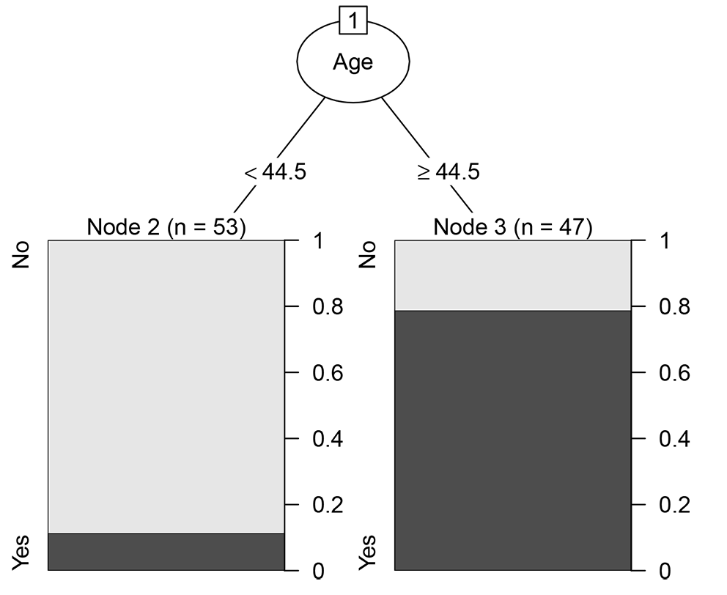


## Figure S3 Decision tree model visualization for predicting carotid atherosclerosis in LADA patients based on age.
