# Supplementary material for: Predicting Carotid Atherosclerosis in Latent Autoimmune Diabetes in Adult Patients Using Machine Learning Models: A Retrospective Study
Source: Research Square preprint supplement (doi:10.21203/rs.3.rs-6131962/v1), 2025-04-14
Supplement: Supplementary file 2 [file a095dd2d25150eaee1829c1d.xlsx]

## Sheet: Table S2
Variables	Total (n = 142)	Training set (n = 100)	Testing set (n = 42)	P
Age (years)	44.00 (33.25, 57.00)	46.50 (34.00, 61.50)	43.50 (33.00, 55.00)	0.368
Gender (n, %)				0.086
Male	79 (55.63)	28 (66.67)	51 (51.00)
Female	63 (44.37)	14 (33.33)	49 (49.00)
Diabetes duration (years)	7.00 (2.00, 14.00)	5.00 (2.00, 14.50)	8.50 (2.00, 14.00)	0.619
Smoke (n, %)				0.513
No	87 (61.27)	24 (57.14)	63 (63.00)
Yes	55 (38.73)	18 (42.86)	37 (37.00)
Drink (n, %)				0.244
No	101 (71.13)	27 (64.29)	74 (74.00)
Yes	41 (28.87)	15 (35.71)	26 (26.00)
Insulin usage (n, %)				0.734
No	40 (28.17)	11 (26.19)	29 (29.00)
Yes	102 (71.83)	31 (73.81)	71 (71.00)
Carotid atherosclerosis (n, %)				0.613
No	79 (55.63)	22 (52.38)	57 (57.00)
Yes	63 (44.37)	20 (47.62)	43 (43.00)
BMI (kg/m2)	22.11 (20.13, 24.30)	22.46 (19.95, 24.39)	22.04 (20.26, 23.88)	0.869
SBP (mmHg)	128.81 ± 21.21	129.19 ± 19.90	128.65 ± 21.83	0.89
DBP (mmHg)	76.00 (70.00, 84.00)	74.50 (70.00, 86.25)	76.00 (70.00, 84.00)	0.952
HbA1c (%)	9.60 (8.40, 10.61)	9.69 (8.72, 10.91)	9.48 (7.97, 10.59)	0.278
FPG (mmol/L)	8.36 (6.58, 10.25)	8.14 (6.79, 9.83)	8.45 (6.57, 10.59)	0.66
FCP (uIU/mL)	0.33 (0.12, 1.35)	0.39 (0.15, 1.27)	0.31 (0.08, 1.37)	0.874
FI (uIU/mL)	5.52 (2.94, 7.72)	4.16 (1.69, 7.34)	5.86 (3.44, 7.85)	0.181
TC (mmol/L)	4.73 (3.84, 5.60)	4.72 (3.69, 5.76)	4.73 (4.04, 5.55)	0.731
TG (mmol/L)	1.33 (0.88, 2.02)	1.29 (0.89, 1.88)	1.33 (0.88, 2.06)	0.89
HDL-C (mmol/L)	1.25 (1.07, 1.49)	1.31 (1.15, 1.51)	1.23 (1.06, 1.48)	0.564
LDL-C (mmol/L)	2.97 ± 0.95	2.91 ± 1.01	2.99 ± 0.93	0.662
TyG	9.48 ± 0.43	9.45 ± 0.44	9.49 ± 0.43	0.601
AIP	0.02 (-0.13, 0.21)	0.02 (-0.13, 0.19)	0.02 (-0.14, 0.24)	0.877
IAB (IU/mL)	8.41 (5.71, 16.66)	6.81 (5.45, 15.15)	9.00 (5.80, 16.75)	0.298
ICA (IU/mL)	24.20 (9.52, 57.12)	31.26 (11.03, 55.37)	23.22 (9.50, 57.13)	0.52
GADA (IU/mL)	53.80 (24.31, 135.81)	60.54 (25.69, 154.05)	51.32 (23.97, 118.40)	0.516
ALT (IU/L)	19.01 (13.75, 27.21)	19.75 (13.80, 22.98)	18.75 (13.80, 28.05)	0.655
AST (IU/L)	19.25 (16.12, 23.60)	19.50 (15.53, 23.75)	18.80 (16.17, 23.38)	0.947
BUN (mmol/L)	5.97 (4.93, 7.10)	5.60 (4.95, 6.38)	6.15 (4.97, 7.30)	0.196
Scr (μmol/L)	76.00 (67.23, 86.25)	74.40 (67.73, 80.61)	77.40 (66.62, 87.78)	0.361
UA (μmol/L)	277.70 (228.15, 331.52)	268.35 (212.28, 315.35)	287.35 (230.93, 333.30)	0.252
ALB (g/L)	42.20 (39.32, 44.90)	42.00 (39.50, 44.80)	42.35 (39.30, 44.90)	0.979
WBC (*109/L)	6.10 (5.20, 7.29)	5.76 (5.10, 6.97)	6.16 (5.30, 7.43)	0.28
TSH (mIU/L)	1.81 (1.13, 3.00)	1.85 (1.26, 2.61)	1.76 (1.12, 3.05)	0.844
FT3 (pmol/L)	2.96 (2.77, 3.26)	2.89 (2.66, 3.25)	2.98 (2.82, 3.25)	0.182
FT4 (ng/dL)	1.35 ± 0.30	1.30 ± 0.29	1.36 ± 0.30	0.281
25(OH)D (ng/mL)	17.52 (12.78, 20.56)	18.01 (13.84, 22.49)	16.91 (12.50, 20.34)	0.367
