# Supplementary material for: Predicting Carotid Atherosclerosis in Latent Autoimmune Diabetes in Adult Patients Using Machine Learning Models: A Retrospective Study
Source: Research Square preprint supplement (doi:10.21203/rs.3.rs-6131962/v1), 2025-04-14
Supplement: Supplementary file 3 [file a6641e527c0f567fb8d4cbbe.docx]

| Variables | univariate logistic regression | | | | |  | multivariate logistic regression | | | | |
| --- | --- | --- | --- | --- | --- | --- | --- | --- | --- | --- | --- |
| β | S.E | Z | *P* | OR (95%CI) | β | S.E | Z | *P* | OR (95%CI) |
| Age | 0.16 | 0.03 | 6.34 | <.001 | 1.18 (1.12 ~ 1.24) |  | 0.22 | 0.04 | 5.88 | <.001 | 1.24 (1.16 ~ 1.34) |
| Gender |  |  |  |  |  |  |  |  |  |  |  |
| 1 |  |  |  |  | 1.00 (Reference) |  |  |  |  |  |  |
| 2 | -0.23 | 0.34 | -0.66 | 0.507 | 0.80 (0.41 ~ 1.56) |  |  |  |  |  |  |
| Duration | 0.06 | 0.02 | 2.40 | 0.016 | 1.06 (1.01 ~ 1.11) |  |  |  |  |  |  |
| Smoke |  |  |  |  |  |  |  |  |  |  |  |
| 0 |  |  |  |  | 1.00 (Reference) |  |  |  |  |  | 1.00 (Reference) |
| 1 | 0.80 | 0.35 | 2.27 | 0.023 | 2.22 (1.12 ~ 4.42) |  | 2.60 | 0.71 | 3.63 | <.001 | 13.42 (3.31 ~ 54.47) |
| Drink |  |  |  |  |  |  |  |  |  |  |  |
| 0 |  |  |  |  | 1.00 (Reference) |  |  |  |  |  |  |
| 1 | 0.11 | 0.37 | 0.30 | 0.763 | 1.12 (0.54 ~ 2.32) |  |  |  |  |  |  |
| Insulin |  |  |  |  |  |  |  |  |  |  |  |
| 0 |  |  |  |  | 1.00 (Reference) |  |  |  |  |  |  |
| 1 | -0.60 | 0.38 | -1.59 | 0.112 | 0.55 (0.26 ~ 1.15) |  |  |  |  |  |  |
| BMI | 0.15 | 0.05 | 2.69 | 0.007 | 1.16 (1.04 ~ 1.29) |  |  |  |  |  |  |
| SBP | 0.03 | 0.01 | 3.52 | <.001 | 1.03 (1.01 ~ 1.05) |  |  |  |  |  |  |
| DBP | 0.01 | 0.01 | 0.76 | 0.449 | 1.01 (0.98 ~ 1.04) |  |  |  |  |  |  |
| HbA1c | -0.01 | 0.08 | -0.07 | 0.942 | 0.99 (0.85 ~ 1.16) |  |  |  |  |  |  |
| FPG | -0.05 | 0.06 | -0.75 | 0.453 | 0.96 (0.85 ~ 1.08) |  |  |  |  |  |  |
| CP | 0.17 | 0.16 | 1.08 | 0.282 | 1.19 (0.87 ~ 1.63) |  |  |  |  |  |  |
| INS | -0.00 | 0.02 | -0.00 | 0.999 | 1.00 (0.95 ~ 1.05) |  |  |  |  |  |  |
| TC | 0.00 | 0.10 | 0.05 | 0.963 | 1.00 (0.82 ~ 1.23) |  |  |  |  |  |  |
| TG | 0.02 | 0.11 | 0.21 | 0.831 | 1.02 (0.82 ~ 1.27) |  |  |  |  |  |  |
| HDL | -0.63 | 0.55 | -1.14 | 0.254 | 0.53 (0.18 ~ 1.57) |  |  |  |  |  |  |
| LDL | 0.18 | 0.18 | 1.00 | 0.316 | 1.20 (0.84 ~ 1.71) |  |  |  |  |  |  |
| TyG | -0.15 | 0.39 | -0.38 | 0.704 | 0.86 (0.40 ~ 1.85) |  |  |  |  |  |  |
| AIP | 0.69 | 0.53 | 1.29 | 0.197 | 1.99 (0.70 ~ 5.67) |  |  |  |  |  |  |
| IAB | 0.00 | 0.01 | 0.79 | 0.427 | 1.00 (0.99 ~ 1.01) |  |  |  |  |  |  |
| ICA | 0.00 | 0.00 | 1.25 | 0.212 | 1.00 (1.00 ~ 1.01) |  |  |  |  |  |  |
| GADA | 0.00 | 0.00 | 0.68 | 0.497 | 1.00 (1.00 ~ 1.00) |  |  |  |  |  |  |
| ALT | 0.00 | 0.01 | 0.46 | 0.644 | 1.00 (0.99 ~ 1.02) |  |  |  |  |  |  |
| AST | 0.01 | 0.01 | 0.51 | 0.609 | 1.01 (0.98 ~ 1.03) |  |  |  |  |  |  |
| BUN | 0.05 | 0.07 | 0.72 | 0.474 | 1.05 (0.92 ~ 1.21) |  |  |  |  |  |  |
| Scr | 0.00 | 0.01 | 0.16 | 0.874 | 1.00 (0.99 ~ 1.01) |  |  |  |  |  |  |
| UA | 0.00 | 0.00 | 0.14 | 0.892 | 1.00 (1.00 ~ 1.00) |  |  |  |  |  |  |
| ALB | -0.11 | 0.04 | -2.58 | 0.010 | 0.90 (0.83 ~ 0.97) |  |  |  |  |  |  |
| WBC | -0.04 | 0.08 | -0.46 | 0.643 | 0.96 (0.82 ~ 1.13) |  |  |  |  |  |  |
| TSH | -0.00 | 0.08 | -0.06 | 0.956 | 1.00 (0.85 ~ 1.17) |  |  |  |  |  |  |
| FT3 | -1.15 | 0.44 | -2.61 | 0.009 | 0.32 (0.13 ~ 0.75) |  |  |  |  |  |  |
| FT4 | 0.24 | 0.57 | 0.42 | 0.671 | 1.27 (0.42 ~ 3.89) |  |  |  |  |  |  |
| 25(OH)D | 0.02 | 0.02 | 0.94 | 0.347 | 1.02 (0.98 ~ 1.06) |  |  |  |  |  |  |
